# Supplementary material for: Lanatoside C, a cardiac glycoside, acts through protein kinase Cδ to cause apoptosis of human hepatocellular carcinoma cells
Source: PubMed Central journal article supplement (PMC5384006; doi:10.1038/srep46134), 2017-04-07

**Lanatoside C, a cardiac glycoside, acts through protein kinase C $\delta$  to cause apoptosis of human hepatocellular carcinoma cells**

Min-Wu Chao<sup>1\*</sup>, Tzu-Hsuan Chen<sup>2\*</sup>, Han-Li Huang<sup>1\*</sup>, Yu-Wei Chang<sup>3</sup>, Wei-Chun Huang<sup>1</sup>, Yu-Ching Lee<sup>4,5</sup>, Che-Ming Teng<sup>3,6</sup>, Shioh-Lin Pan<sup>1,7</sup>

<sup>1</sup> *The Ph.D. Program for Cancer Biology and Drug Discovery, College of Medical Science and Technology, Taipei Medical University*

<sup>2</sup> *Division of Industrial Promotion, Development Center for Biotechnology*

<sup>3</sup> *Pharmacological Institute, College of Medicine, National Taiwan University*

<sup>4</sup> *The Center of Translational Medicine, Taipei Medical University*

<sup>5</sup> *Ph.D. Program for Biotechnology in Medicine, College of Medical Science and Technology, Taipei Medical University*

<sup>6</sup> *School of Pharmacy, College of Pharmacy, Taipei Medical University*

<sup>7</sup> *Department of Pharmacology, College of Medicine, Taipei Medical University*

\* equal contribution first author

**Correspondences:**

**Shioh-Lin Pan, Ph.D.**

The Ph.D. Program for Cancer Biology and Drug Discovery, College of Medical Science and Technology, Taipei Medical University, No. 250, Wu-hsing St., Taipei 11031, Taiwan.

Tel: 886-2-27361661 # 7671

E-mail: slpan@tmu.edu.tw

Min-Wu Chao: [Jaw.fay@gmail.com](mailto:Jaw.fay@gmail.com)

Tzu-Hsuan Chen: [r91443007@ntu.edu.tw](mailto:r91443007@ntu.edu.tw)

Han-Li Huang: [hanlilijh@gmail.com](mailto:hanlilijh@gmail.com)

Yu-Wei Chang: [yahwehmax@hotmail.com](mailto:yahwehmax@hotmail.com)

Wei-Chun HuangFu: [clarehf@tmu.edu.tw](mailto:clarehf@tmu.edu.tw)

Yu-Ching Lee: [b8404056@tmu.edu.tw](mailto:b8404056@tmu.edu.tw)

Che-Ming Teng: [cmteng@ntu.edu.tw](mailto:cmteng@ntu.edu.tw)

Shiow-Lin Pan: [sipan@tmu.edu.tw](mailto:sipan@tmu.edu.tw)

(A)

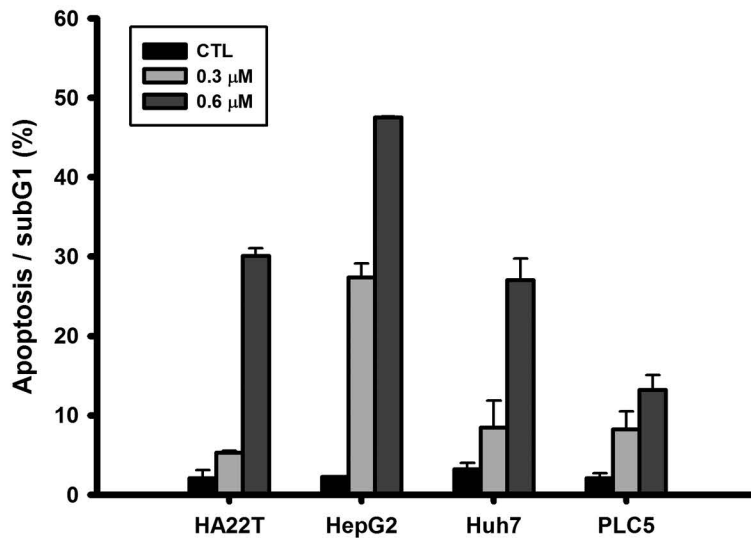

(B)

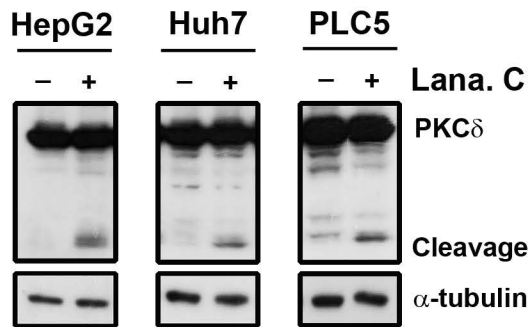

**Supplementary Figure S1. Lanatoside C induced apoptosis and PKC $\delta$  activation in other HCC cells.**

(A) HA22T, HepG2, Huh7 and PLC5 cells were treated with lanatoside C (0.6  $\mu$ M) for 48 h. Apoptotic cells were stained with PI, and then analyzed by flow cytometry. (B) HepG2, Huh7 and PLC5 cells were incubated with lanatoside C (0.6  $\mu$ M) for 48 h and PKC $\delta$  from total lysates by Western blot analysis.

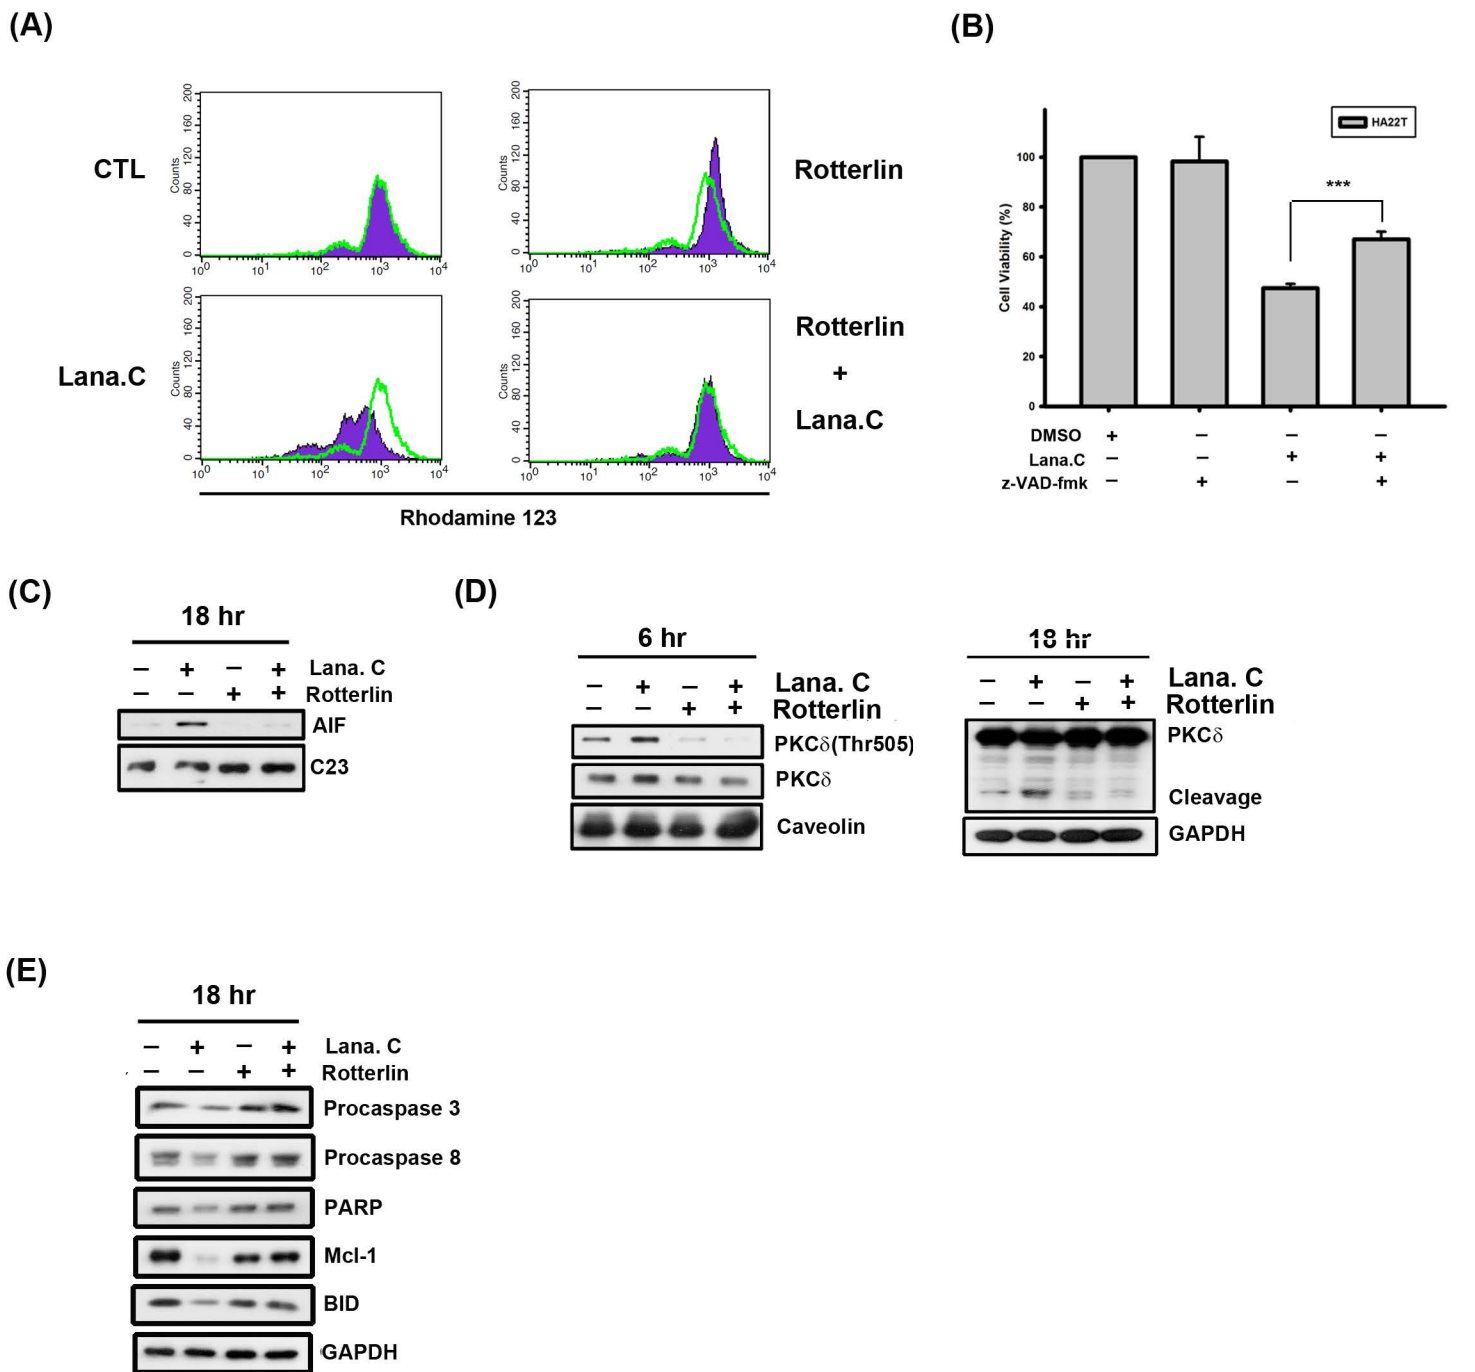

**Supplementary Figure S2. Lanatoside C triggered apoptosis was through PKC $\delta$  activation in HA22T cell line.**

(A) HA22T cells were incubated with DMSO or with lanatoside C (0.6  $\mu$ M), in the presence or absence of rotterlin (10  $\mu$ M), for 18 h, and then cells were incubated with rhodamine123 (5  $\mu$ M) for 30 minutes. Data acquisition and analysis were performed on a FACScan flow cytometry. (B) HA22T cells were incubated in 0.6  $\mu$ M lanatoside C with or without 100  $\mu$ M z-VAD-fmk for 24 h. The cell viability was determined by using MTT assay as described in methods. Data are repeated at least three independent determinations. \*\*\* P < 0.001. (C) HA22T cells were incubated with lanatoside C (0.6  $\mu$ M), rotterlin (10  $\mu$ M), or combination treatment for 18 h, and then cells were harvested from nuclear fraction for detection of the AIF expression. C23 was a nuclear marker protein used as internal control. (D) HA22T cells were treated lanatoside C (0.6  $\mu$ M) or co-incubated with rotterlin (10  $\mu$ M) for 18 h and detected of PKC $\delta$  Thr505 in membrane fraction and PKC $\delta$  from total lysates by Western blot analysis. Caveolin was a membrane marker protein and GAPDH used as internal control. (E) HA22T cells were incubated with lanatoside C (0.6  $\mu$ M), rotterlin (10  $\mu$ M), or combination treatment for 18 h, and then cells were harvested from total lysates for detection of the indicated protein expressions by using Western blot analysis. Results are representative of three independent experiments.

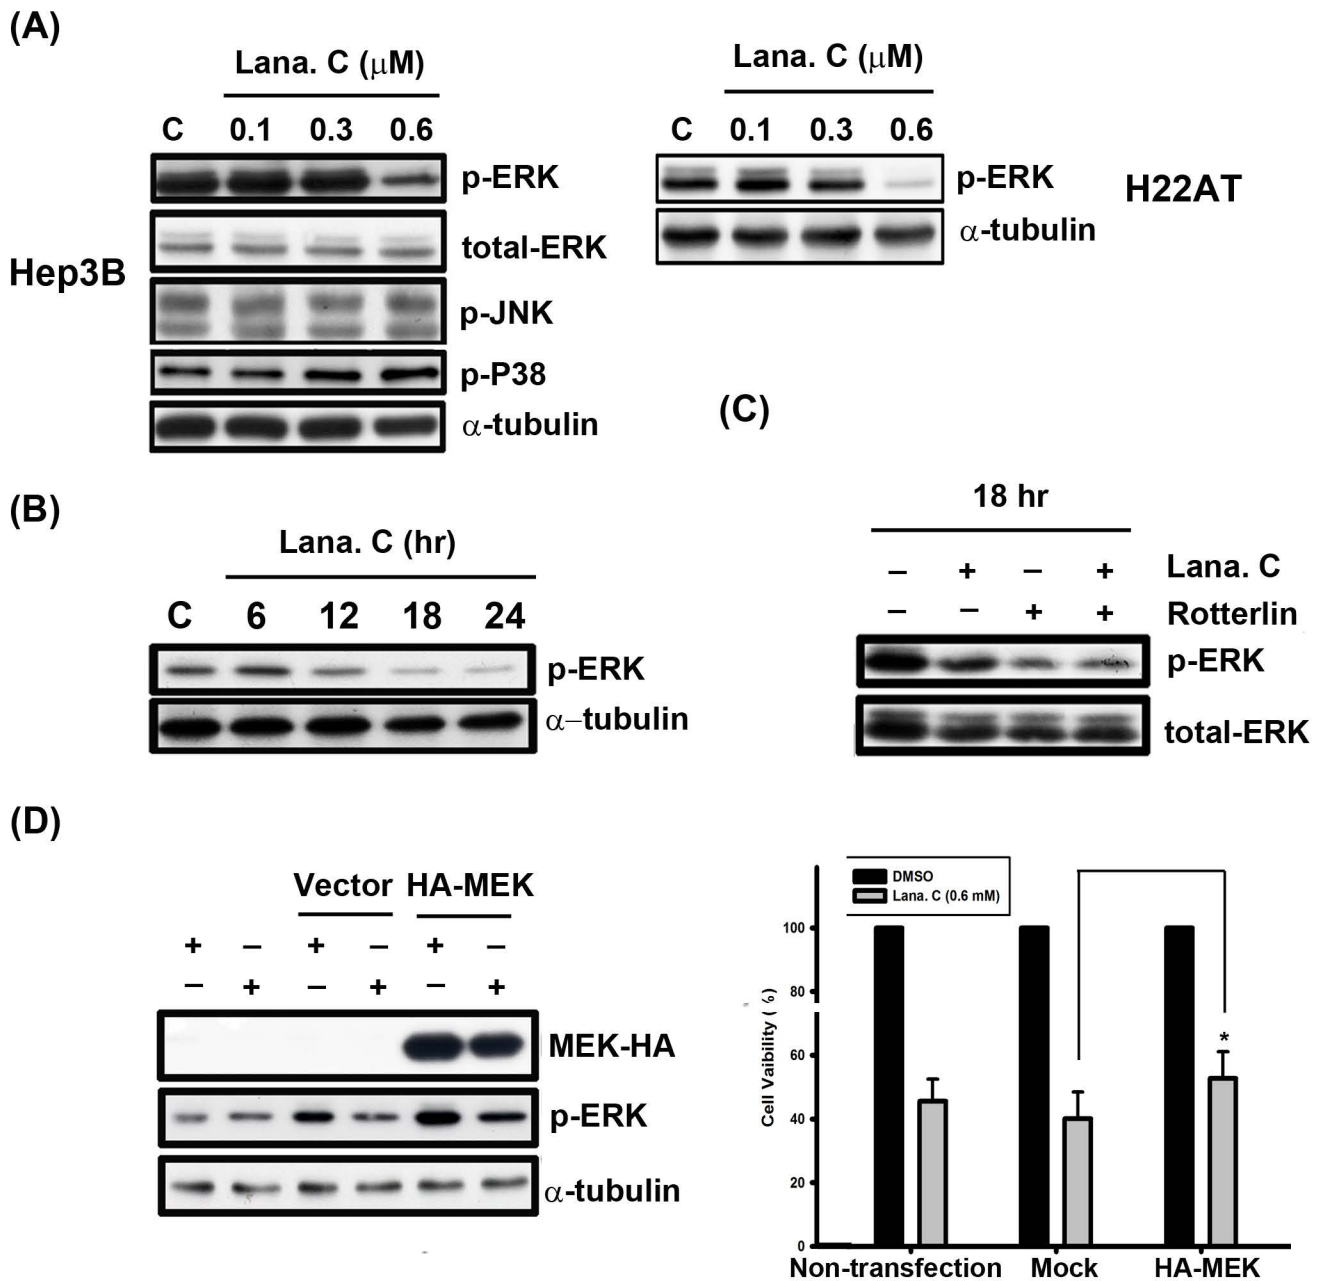

**Supplementary Figure S3. Effect of lanatoside C on MAPK pathway.**

(A) Hep3B and HA22T cells were treated with a range of lanatoside C (0.1-0.6  $\mu$ M) for 18 h. (B) Hep3B cells were treated lanatoside C (0.6  $\mu$ M) for indicated time (6-24 hr), and then cells were harvested from total lysates for observation of p-ERK, total-ERK, p-JNK, and p-P38 by using Western blot analysis.  $\alpha$ -tubulin as internal control. (C) Hep3B cells were incubated with lanatoside C (0.6  $\mu$ M), rottlerin (5  $\mu$ M) or PKC $\delta$  siRNA, or combination treatment for 18 h, and then cells were harvested from total lysates for detection of indicated protein expressions by using Western blot analysis. (D) Hep3B cells were transfected with empty vector (MOCK) or HA-MEK for 6 h, and re-serum overnight, followed by treatment with or without lanatoside C (0.6  $\mu$ M) for 18 h. Cells were harvested from total lysates for detection of ERK phosphorylation by using Western blot analysis. Cell viability was measured by MTT assay. Data are expressed as means  $\pm$  SEM of three independent determinations. \* P < 0.01, HA-MEK-overexpressed cells versus MOCK-transfected cells.

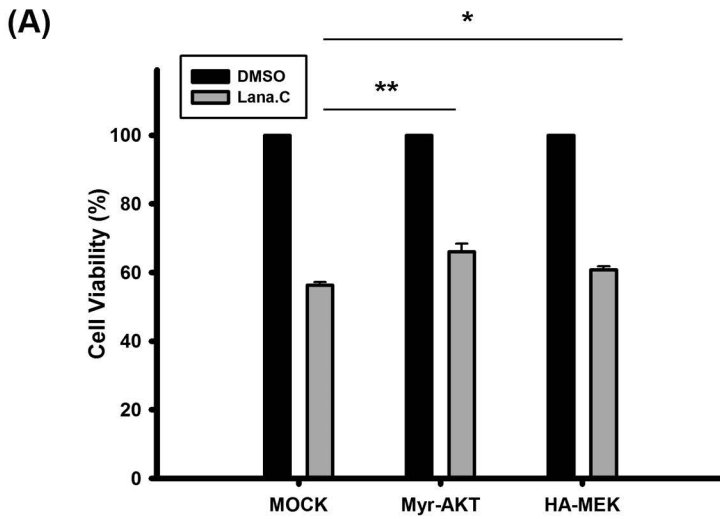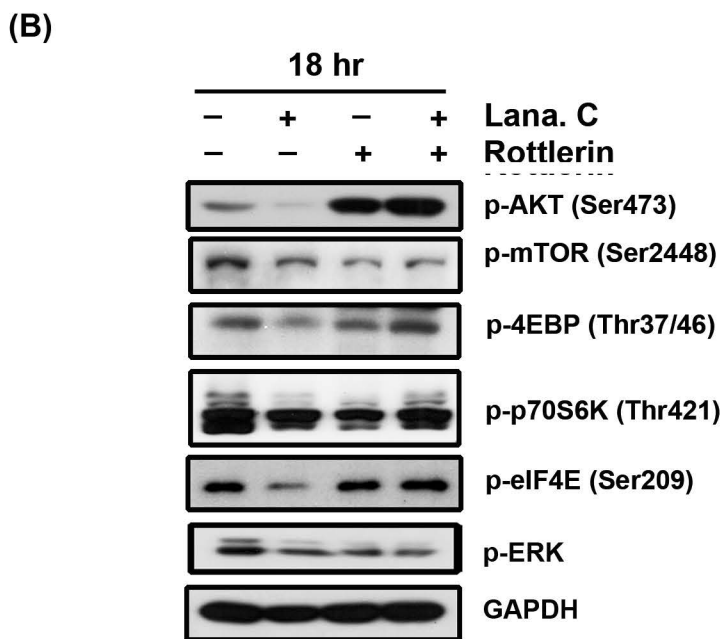

**Supplementary Figure S4. PKC $\delta$  was involved in lanatoside C induced AKT/mTOR pathway downregulation.**

(A) HA22T cells were transfected with empty vector (MOCK) or Myr-AKT or HA-MEK for 8 h, and re-serum overnight, followed by treatment with or without lanatoside C (0.6  $\mu$ M) for 18 h. Cell viability was measured by MTT assay.

(B) HA22T cells were incubated with lanatoside C (0.6  $\mu$ M), rottlerin (10  $\mu$ M) or combination treatment for 18 h, and then cells were harvested from total lysates for detection of indicated protein expressions by using Western blot analysis. Data are expressed as means  $\pm$  SEM of three independent determinations. Data are expressed as means  $\pm$  SEM of three independent determinations. \* P < 0.05, \*\* P < 0.01.

**Figure 2**

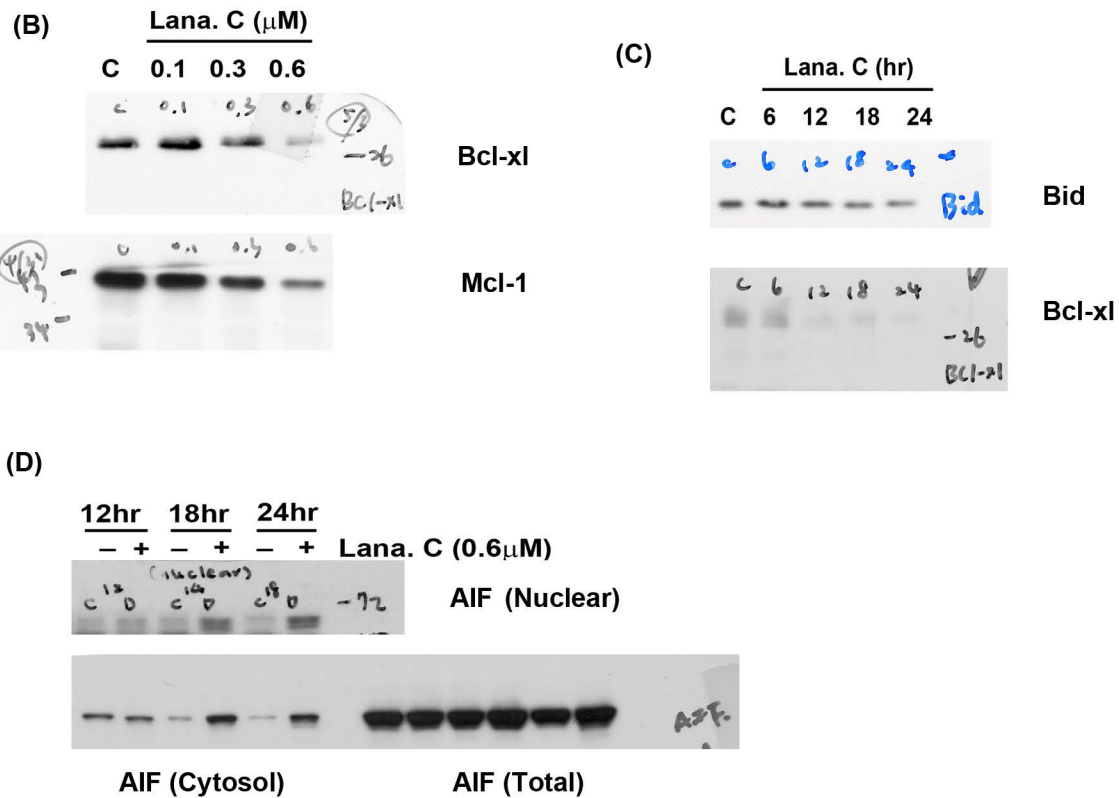

**Figure 3**

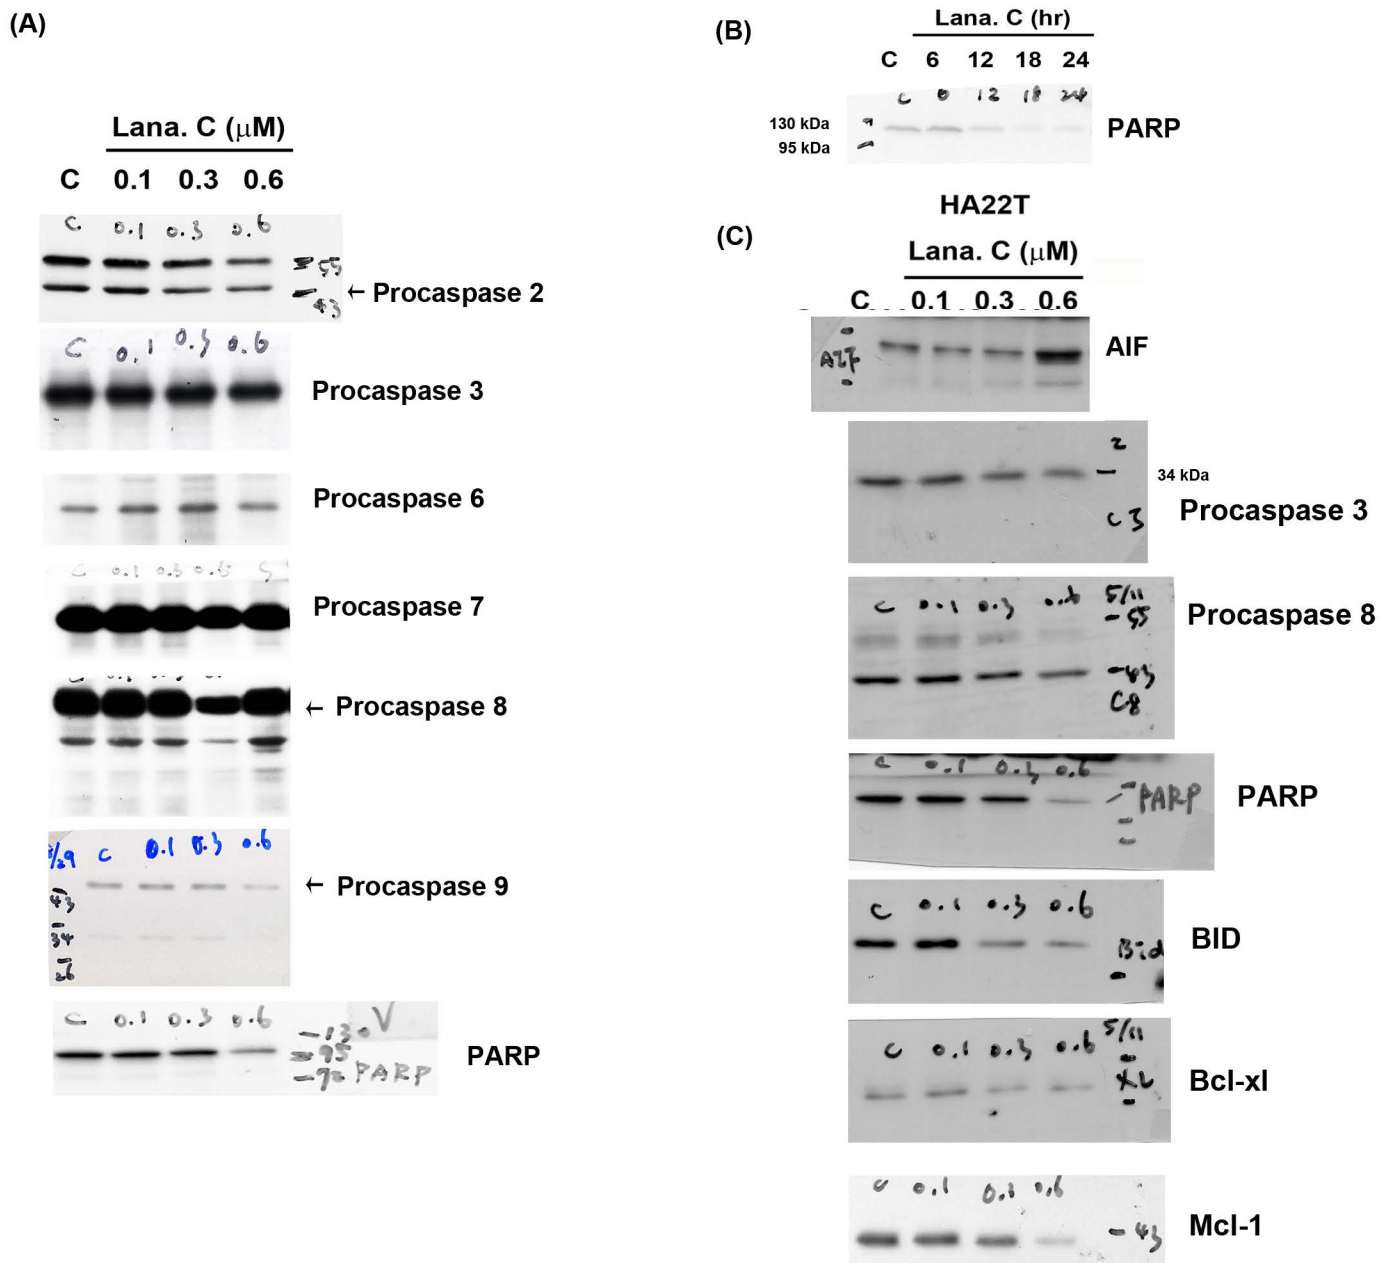

**Figure 4.**

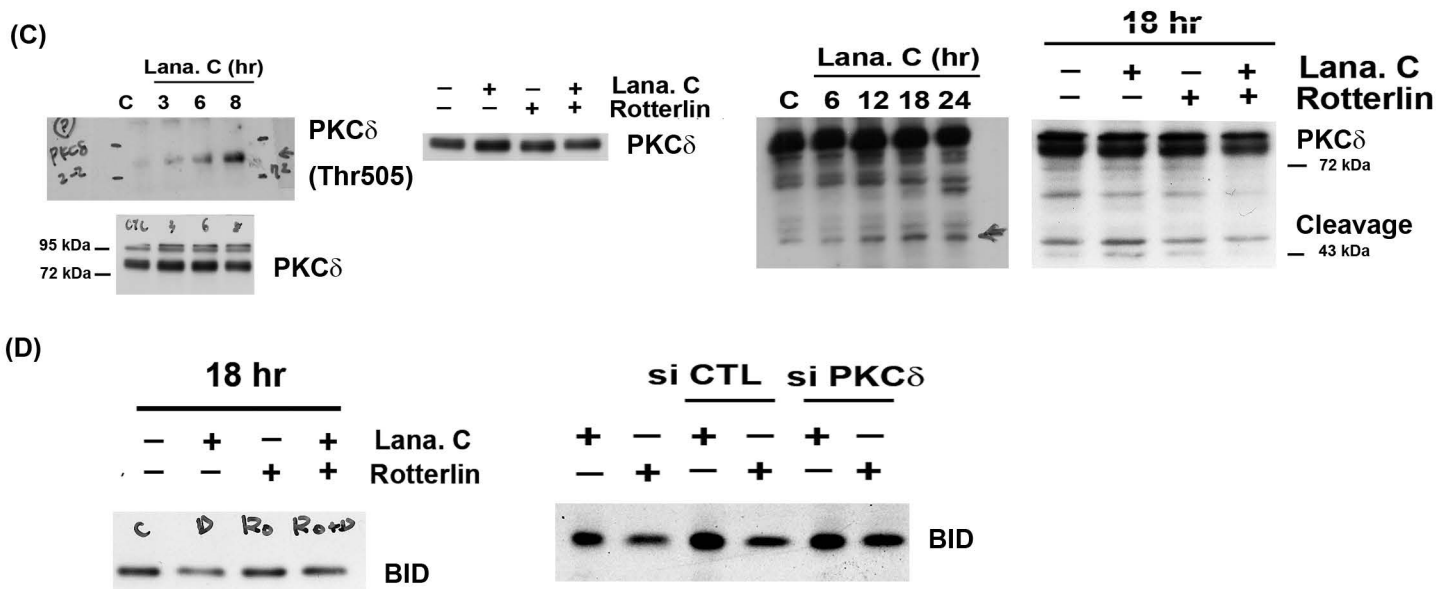

**Figure 5.**

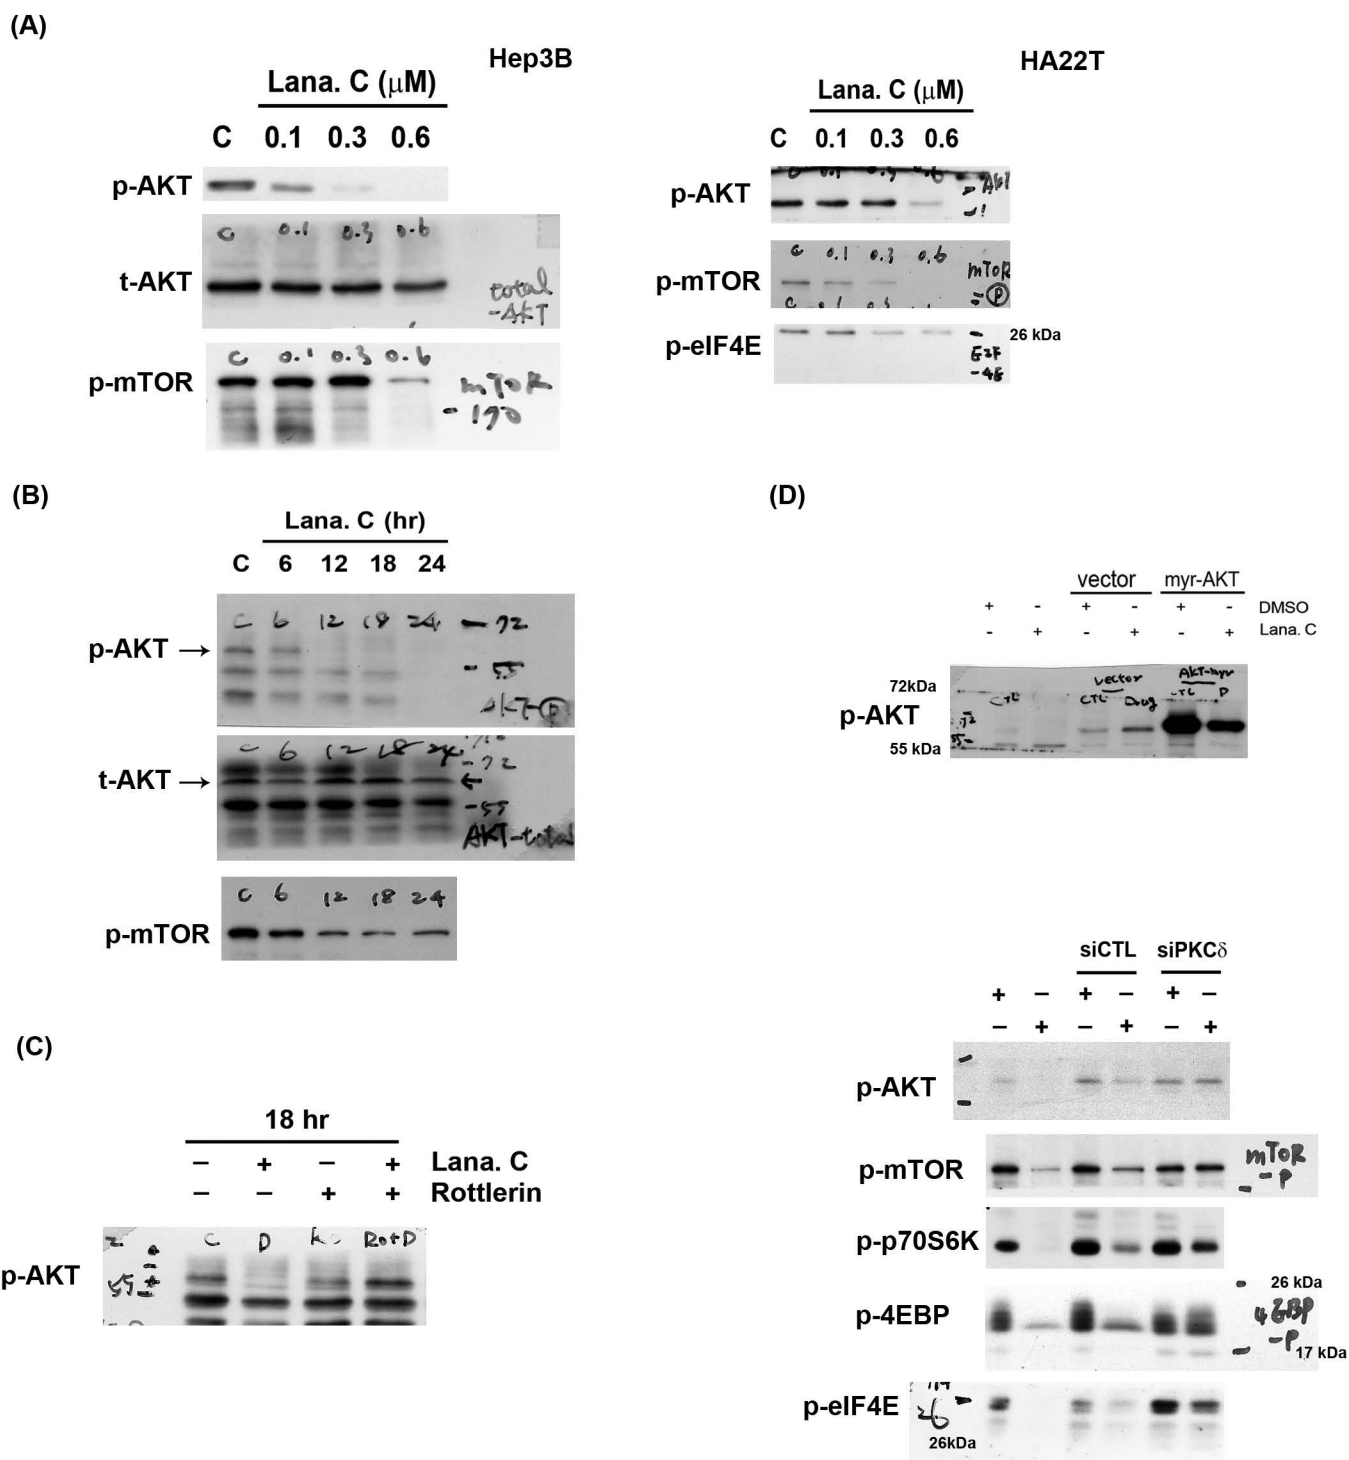

Supplement: srep46134-s1.pdf [file srep46134-s1.pdf]
